# Supplementary material
Source: MDPI journal article supplement (https://www.mdpi.com/2227-9091/5/1/17)
Supplement: s1 [file s1]

The statistical package **R** was used to generate all the results

A note on the order and description of codes:

1. Initial commands: Please run this first.
2. Plots for section 2 and appendix - can be run at any point.
3. Models:
  - a) Entire Population by Sex with Bootstrap - Generating the data for Section 4 Plots. This runs the initial models that will give data for plots 3-5.(this will take some time to run)
  - b) Plots for section 4 - will give the plots.
  - c) Models for tables in section 4 - data for tables 4 and 5
4. "Table 5 CI code" (a) and "Plots for CI Section 4 Table 5" (b) produce the plots with Confidence intervals for table 5. These plots are then used to determine the significances used in table 5.
