# Supplementary material
Source: MDPI journal article supplement (https://www.mdpi.com/2227-9091/5/1/17)
Supplement: s1 [file s1]

Archive with 9 entries (8 files):
- MYNAME_DATE/
- MYNAME_DATE/1-Initial Commands.R
- MYNAME_DATE/2-Plots for Section 2 and appendix new.R
- MYNAME_DATE/3a-Entire Population by Sex with Bootstrap - Generating the data for Section 4 Plots.R
- MYNAME_DATE/3b-Plots for Section 4 new.R
- MYNAME_DATE/3c-Models for tables in Section 4.R
- MYNAME_DATE/4a -Table 5 CI code.R
- MYNAME_DATE/5b-Plots for CI Section 4 Table 5.R
- MYNAME_DATE/README.pdf
